# Supplementary material
Source: MDPI journal article supplement (https://www.mdpi.com/1996-1073/14/16/4818)
Supplement: s1 [file s1]

## Supplementary Information

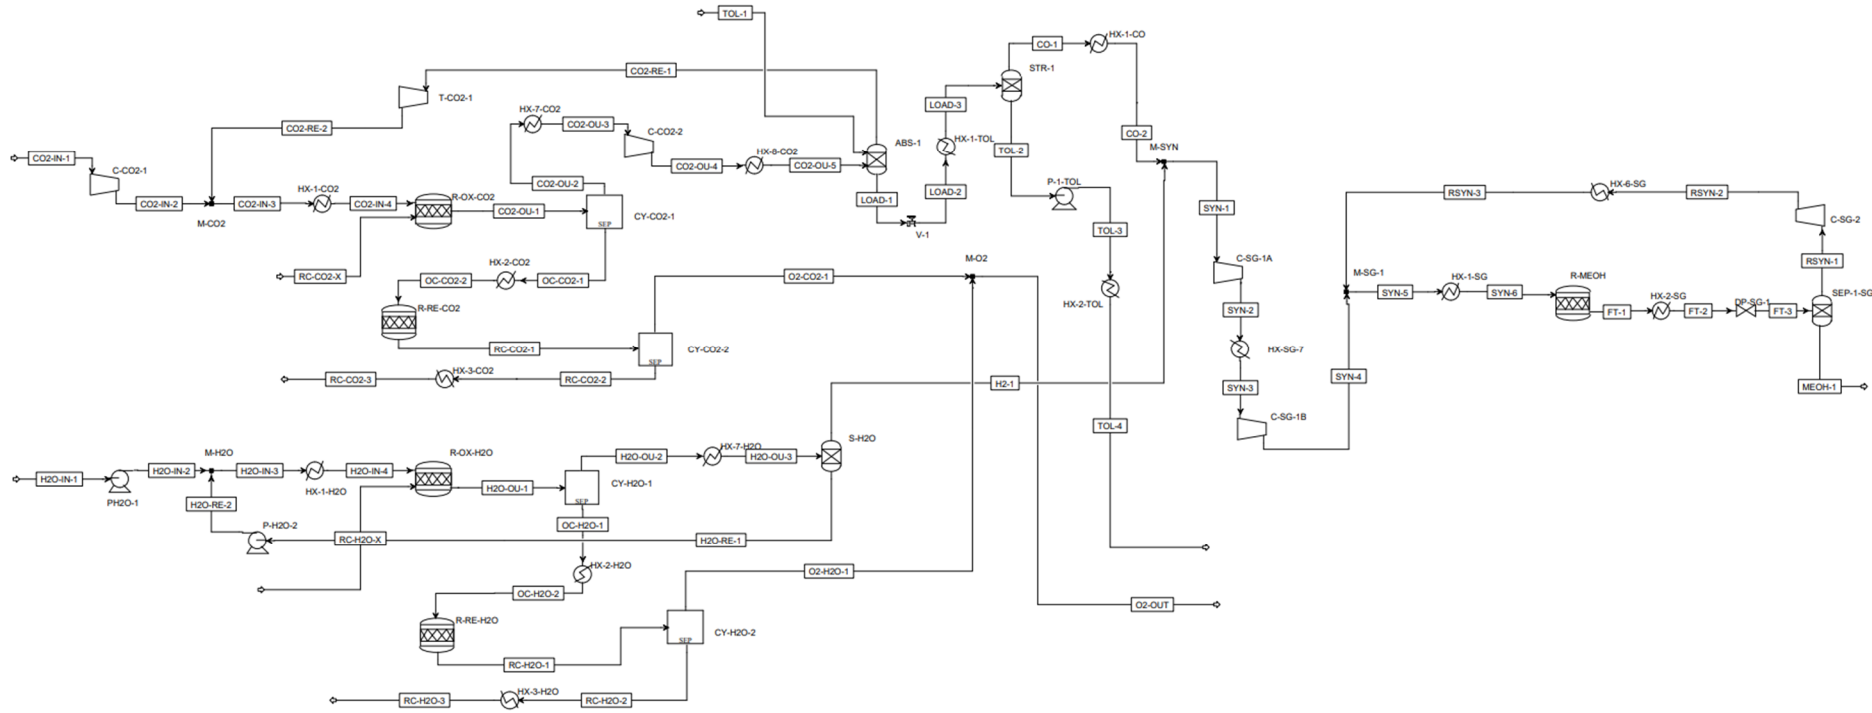

**Figure S1.** Flowsheet of the Aspen Plus® simulation of synthetic fuel production.

**Table S1.** Stream information of the Aspen Plus® simulation of synthetic fuel production (part 1).

| Variable                       | Units  | CO2-IN-1 | CO2-IN-2 | CO2-IN-3 | CO2-IN-4 | CO2-OU-1 | CO2-OU-2 | CO2-OU-3 | CO2-OU-4 | CO2-OU-5 | CO2-RE-1 | CO2-RE-2 | CO-1  | CO-2  | FT-1  | FT-2  | FT-3  | H2-1  | H2O-IN-1 |
|--------------------------------|--------|----------|----------|----------|----------|----------|----------|----------|----------|----------|----------|----------|-------|-------|-------|-------|-------|-------|----------|
| Temperature                    | °C     | 25.0     | 191.8    | 79.5     | 900.0    | 900.0    | 900.0    | 50.0     | 319.9    | 50.0     | 31.8     | -1.7     | 80.0  | 40.0  | 250.0 | 50.0  | 49.5  | 50.0  | 25.0     |
| Pressure                       | bar    | 1.0      | 5.0      | 5.0      | 5.0      | 1.0      | 1.0      | 1.0      | 10.0     | 10.0     | 10.0     | 5.0      | 1.0   | 1.0   | 50.0  | 50.0  | 45.0  | 1.0   | 1.0      |
| Molar Vapor Fraction           |        | 1.000    | 1.000    | 1.000    | 1.000    | 0.162    | 1.000    | 1.000    | 1.000    | 1.000    | 1.000    | 1.000    | 1.000 | 1.000 | 1.000 | 0.754 | 0.755 | 1.000 | 0.000    |
| Molar Liquid Fraction          |        | 0.000    | 0.000    | 0.000    | 0.000    | 0.000    | 0.000    | 0.000    | 0.000    | 0.000    | 0.000    | 0.000    | 0.000 | 0.000 | 0.000 | 0.246 | 0.245 | 0.000 | 1.000    |
| Molar Solid Fraction           |        | 0.000    | 0.000    | 0.000    | 0.000    | 0.838    | 0.000    | 0.000    | 0.000    | 0.000    | 0.000    | 0.000    | 0.000 | 0.000 | 0.000 | 0.000 | 0.000 | 0.000 | 0.000    |
| Enthalpy Flow                  | kW     | -2484    | -2441    | -6185    | -5538    | -87743   | -3849    | -4417    | -4256    | -4420    | -3734    | -3744    | -688  | -695  | -1772 | -2165 | -2165 | 9     | -3608    |
| Mole Flows                     | kmol/h | 22.7     | 22.7     | 57.0     | 57.0     | 351.2    | 57.0     | 57.0     | 57.0     | 57.0     | 34.3     | 34.3     | 22.7  | 22.7  | 90.9  | 90.9  | 90.9  | 45.4  | 45.4     |
| <b>Mole Fractions</b>          |        |          |          |          |          |          |          |          |          |          |          |          |       |       |       |       |       |       |          |
| H <sub>2</sub>                 |        | 0.000    | 0.000    | 0.000    | 0.000    | 0.000    | 0.000    | 0.000    | 0.000    | 0.000    | 0.000    | 0.000    | 0.000 | 0.000 | 0.500 | 0.500 | 0.500 | 1.000 | 0.000    |
| H <sub>2</sub> O               |        | 0.000    | 0.000    | 0.000    | 0.000    | 0.000    | 0.000    | 0.000    | 0.000    | 0.000    | 0.000    | 0.000    | 0.000 | 0.000 | 0.000 | 0.000 | 0.000 | 0.000 | 1.000    |
| CO <sub>2</sub>                |        | 1.000    | 1.000    | 0.996    | 0.996    | 0.097    | 0.598    | 0.598    | 0.598    | 0.598    | 0.993    | 0.993    | 0.000 | 0.000 | 0.000 | 0.000 | 0.000 | 0.000 | 0.000    |
| CO                             |        | 0.000    | 0.000    | 0.004    | 0.004    | 0.065    | 0.402    | 0.402    | 0.402    | 0.402    | 0.007    | 0.007    | 1.000 | 1.000 | 0.250 | 0.250 | 0.250 | 0.000 | 0.000    |
| O <sub>2</sub>                 |        | 0.000    | 0.000    | 0.000    | 0.000    | 0.000    | 0.000    | 0.000    | 0.000    | 0.000    | 0.000    | 0.000    | 0.000 | 0.000 | 0.000 | 0.000 | 0.000 | 0.000 | 0.000    |
| CEO <sub>2</sub>               |        | 0.000    | 0.000    | 0.000    | 0.000    | 0.834    | 0.000    | 0.000    | 0.000    | 0.000    | 0.000    | 0.000    | 0.000 | 0.000 | 0.000 | 0.000 | 0.000 | 0.000 | 0.000    |
| CE <sub>2</sub> O <sub>3</sub> |        | 0.000    | 0.000    | 0.000    | 0.000    | 0.004    | 0.000    | 0.000    | 0.000    | 0.000    | 0.000    | 0.000    | 0.000 | 0.000 | 0.000 | 0.000 | 0.000 | 0.000 | 0.000    |
| TOLUENE                        |        | 0.000    | 0.000    | 0.000    | 0.000    | 0.000    | 0.000    | 0.000    | 0.000    | 0.000    | 0.000    | 0.000    | 0.000 | 0.000 | 0.000 | 0.000 | 0.000 | 0.000 | 0.000    |
| METHANOL                       |        | 0.000    | 0.000    | 0.000    | 0.000    | 0.000    | 0.000    | 0.000    | 0.000    | 0.000    | 0.000    | 0.000    | 0.000 | 0.000 | 0.250 | 0.250 | 0.250 | 0.000 | 0.000    |

**Table S1.** Stream information of the Aspen Plus® simulation of synthetic fuel production (part 2).

| Variable                       | Units  | H2O-IN-2 | H2O-IN-3 | H2O-IN-4 | H2O-OU-1 | H2O-OU-2 | H2O-OU-3 | H2O-RE-1 | H2O-RE-2 | LOAD-1 | LOAD-2 | LOAD-3 | MEOH-1 | O2-CO2-1 | O2-H2O-1 | O2-OUT | OC-CO2-1 | OC-CO2-2 |
|--------------------------------|--------|----------|----------|----------|----------|----------|----------|----------|----------|--------|--------|--------|--------|----------|----------|--------|----------|----------|
| Temperature                    | °C     | 25.1     | 40.1     | 900.0    | 900.0    | 900.0    | 50.0     | 50.0     | 50.1     | 31.8   | 29.0   | 80.0   | 49.5   | 1500.0   | 1500.0   | 1500.0 | 900.0    | 1500.0   |
| Pressure                       | bar    | 2.0      | 2.0      | 2.0      | 1.0      | 1.0      | 1.0      | 1.0      | 2.0      | 10.0   | 1.0    | 1.0    | 45.0   | 1.0      | 0.1      | 0.1    | 1.0      | 1.0      |
| Molar Vapor Fraction           |        | 0.000    | 0.000    | 1.000    | 0.162    | 1.000    | 0.457    | 0.000    | 0.000    | 0.193  | 0.219  | 0.347  | 0.000  | 1.000    | 1.000    | 1.000  | 0.000    | 0.000    |
| Molar Liquid Fraction          |        | 1.000    | 1.000    | 0.000    | 0.000    | 0.000    | 0.543    | 1.000    | 1.000    | 0.807  | 0.781  | 0.653  | 1.000  | 0.000    | 0.000    | 0.000  | 0.000    | 0.000    |
| Molar Solid Fraction           |        | 0.000    | 0.000    | 0.000    | 0.838    | 0.000    | 0.000    | 0.000    | 0.000    | 0.000  | 0.000  | 0.000  | 0.000  | 0.000    | 0.000    | 0.000  | 1.000    | 1.000    |
| Enthalpy Flow                  | kW     | -3608    | -8985    | -6580    | -171402  | -3620    | -5291    | -5377    | -5376    | -382   | -382   | -39    | -1490  | 160      | 320      | 480    | -83895   | -79794   |
| Mole Flows                     | kmol/h | 45.4     | 113.6    | 113.6    | 702.0    | 113.6    | 113.6    | 68.2     | 68.2     | 107.7  | 107.7  | 107.7  | 22.7   | 11.4     | 22.7     | 34.1   | 294.2    | 294.2    |
| <b>Mole Fractions</b>          |        |          |          |          |          |          |          |          |          |        |        |        |        |          |          |        |          |          |
| H <sub>2</sub>                 |        | 0.000    | 0.000    | 0.000    | 0.065    | 0.400    | 0.400    | 0.000    | 0.000    | 0.000  | 0.000  | 0.000  | 0.000  | 0.000    | 0.000    | 0.000  | 0.000    | 0.000    |
| H <sub>2</sub> O               |        | 1.000    | 1.000    | 1.000    | 0.097    | 0.600    | 0.600    | 1.000    | 1.000    | 0.000  | 0.000  | 0.000  | 0.000  | 0.000    | 0.000    | 0.000  | 0.000    | 0.000    |
| CO <sub>2</sub>                |        | 0.000    | 0.000    | 0.000    | 0.000    | 0.000    | 0.000    | 0.000    | 0.000    | 0.000  | 0.000  | 0.000  | 0.000  | 0.000    | 0.000    | 0.000  | 0.000    | 0.000    |
| CO                             |        | 0.000    | 0.000    | 0.000    | 0.000    | 0.000    | 0.000    | 0.000    | 0.000    | 0.211  | 0.211  | 0.211  | 0.000  | 0.000    | 0.000    | 0.000  | 0.000    | 0.000    |
| O <sub>2</sub>                 |        | 0.000    | 0.000    | 0.000    | 0.000    | 0.000    | 0.000    | 0.000    | 0.000    | 0.000  | 0.000  | 0.000  | 0.000  | 1.000    | 1.000    | 1.000  | 0.000    | 0.000    |
| CEO <sub>2</sub>               |        | 0.000    | 0.000    | 0.000    | 0.835    | 0.000    | 0.000    | 0.000    | 0.000    | 0.000  | 0.000  | 0.000  | 0.000  | 0.000    | 0.000    | 0.000  | 0.996    | 0.996    |
| CE <sub>2</sub> O <sub>3</sub> |        | 0.000    | 0.000    | 0.000    | 0.003    | 0.000    | 0.000    | 0.000    | 0.000    | 0.000  | 0.000  | 0.000  | 0.000  | 0.000    | 0.000    | 0.000  | 0.004    | 0.004    |
| TOLUENE                        |        | 0.000    | 0.000    | 0.000    | 0.000    | 0.000    | 0.000    | 0.000    | 0.000    | 0.789  | 0.789  | 0.789  | 0.000  | 0.000    | 0.000    | 0.000  | 0.000    | 0.000    |
| METHANOL                       |        | 0.000    | 0.000    | 0.000    | 0.000    | 0.000    | 0.000    | 0.000    | 0.000    | 0.000  | 0.000  | 0.000  | 1.000  | 0.000    | 0.000    | 0.000  | 0.000    | 0.000    |





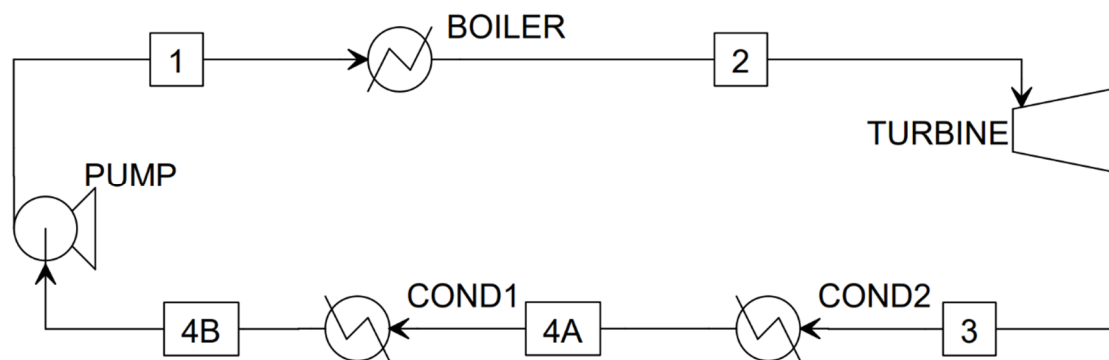

**Figure S2.** Flowsheet of the Aspen Plus® simulation of the steam Rankine cycle.

**Table S2.** Stream information of the Aspen Plus® simulation of the steam Rankine cycle.

| Variable              | Units | 1      | 2      | 3      | 4A     | 4B     |
|-----------------------|-------|--------|--------|--------|--------|--------|
| Temperature           | °C    | 29.6   | 538.0  | 99.6   | 99.6   | 20.0   |
| Pressure              | bar   | 163.0  | 163.0  | 1.0    | 1.0    | 1.0    |
| Molar Vapor Fraction  |       | 0.000  | 1.000  | 0.894  | 0.000  | 0.000  |
| Molar Liquid Fraction |       | 1.000  | 0.000  | 0.106  | 1.000  | 1.000  |
| Enthalpy Flow         | kW    | -15832 | -12570 | -13536 | -15554 | -15887 |
| Mass Flow             | kg/s  | 1.0    | 1.0    | 1.0    | 1.0    | 1.0    |
| <b>Mole Fractions</b> |       |        |        |        |        |        |
| H <sub>2</sub> O      |       | 1.000  | 1.000  | 1.000  | 1.000  | 1.000  |

**Table S3.** Summary of inputs and results for each scenario. The blue part of the table (R1-R17) shows the input data, while in the green area (R18-R33) the results can be observed. Negative values refer to generation of heat, electricity or water. In the table,  $W_d$  and  $Q_d$  are electricity and heat consumption of desalination (1.75 and 5.50 kWh/t H<sub>2</sub>O respectively). The acronym HHV<sub>MeOH</sub> stands for the high heating value of methanol (6.36 kWh/kg), while  $\eta_{RE}$  represents the assumed efficiency of an auxiliary renewable energy like PV ( $\eta_{RE} = 20\%$ ) and  $\eta_{opt}$  is the optical efficiency of the heliostats ( $\eta_{opt} = 60\%$ ).

| Row | Source/Calculation                          | Parameter                            | Units                                  | Baseline | A. Central sHT | B. Central HT | C. Central LT | D. Hybrid LT | E. Decentralized |
|-----|---------------------------------------------|--------------------------------------|----------------------------------------|----------|----------------|---------------|---------------|--------------|------------------|
| R1  | Solar input data                            | Solar thermal energy input (peak)    | kW                                     | 660000   | 660000         | 660000        | 660000        | 660000       | 46.5             |
| R2  |                                             | Cleaning water needs                 | kg H <sub>2</sub> O/h                  | 8607     | 8607           | 8607          | 8607          | 8607         | 0                |
| R3  | DAC Models                                  | Electricity needed                   | kWh/t CO <sub>2</sub>                  | 366      | 154            | 154           | 130           | 120          | 120              |
| R4  |                                             | Heat needed from solar               | kWh/t CO <sub>2</sub>                  | 0        | 1125           | 0             | 0             | 0            | 0                |
| R5  |                                             | Heat needed from waste heat          | kWh/t CO <sub>2</sub>                  | 0        | 0              | 0             | 0             | 0            | 1750             |
| R6  |                                             | Heat needed from cogeneration        | kWh/t CO <sub>2</sub>                  | 0        | 0              | 0             | 1750          | 1750         | 0                |
| R7  |                                             | Heat needed from methane             | kWh/ t CO <sub>2</sub>                 | 1458     | 0              | 1458          | 0             | 0            | 0                |
| R8  |                                             | Oxygen needed                        | kg O <sub>2</sub> /t CO <sub>2</sub>   | 420      | 0              | 420           | 0             | 0            | 0                |
| R9  |                                             | HP Steam produced                    | kWh/t CO <sub>2</sub>                  | 0        | -75            | -75           | 0             | 0            | 0                |
| R10 |                                             | Water consumption                    | kg H <sub>2</sub> O /t CO <sub>2</sub> | 4700     | 4700           | 4700          | -1000         | 0            | -1000            |
| R11 |                                             | Solar heat needed                    | kWh/t CO <sub>2</sub>                  | 27194    | 27194          | 27194         | 27194         | 27194        | 27194            |
| R12 |                                             | HP Steam produced                    | kWh/t CO <sub>2</sub>                  | -3290    | -3290          | -3290         | -3290         | -3290        | -3290            |
| R13 | TCC & Methanol Synthesis Model              | Electricity needed                   | kWh/t CO <sub>2</sub>                  | 746      | 746            | 746           | 746           | 746          | 746              |
| R14 |                                             | Water input required                 | kg H <sub>2</sub> O /t CO <sub>2</sub> | 568      | 568            | 568           | 568           | 568          | 568              |
| R15 |                                             | Oxygen produced                      | kg O <sub>2</sub> /t CO <sub>2</sub>   | 1123     | 1123           | 1123          | 1123          | 1123         | 1123             |
| R16 |                                             | Methanol produced                    | kg MeOH/t CO <sub>2</sub>              | 728      | 728            | 728           | 728           | 728          | 728              |
| R17 | Rankine Model                               | Rankine efficiency                   | %                                      | 0%       | 40%            | 40%           | 28%           | 28%          | 10%              |
| R18 | R1/(R4+R11)                                 | CO <sub>2</sub> processed (peak)     | t CO <sub>2</sub> /h                   | 24.3     | 23.3           | 24.3          | 24.3          | 24.3         | 0.00171          |
| R19 | R18*(R10+R14)+R2                            | Total water demand/production        | kg H <sub>2</sub> O /h                 | 136451   | 131372         | 136451        | -1889         | 22381        | -0.74            |
| R20 | R19* $W_d$ (if R19 < 0, then R20 = 0)       | Electricity needed for desalination  | kW                                     | 239      | 230            | 239           | 0             | 39           | 0                |
| R21 | R19* $Q_d$ (if R19 < 0, then R20 = 0)       | Heat needed for desalination         | kW                                     | 750      | 723            | 750           | 0             | 123          | 0                |
| R22 | R5*R18                                      | Waste heat needed for DAC            | kW                                     | 0        | 0              | 0             | 0             | 0            | 3.00             |
| R23 | R6*R18                                      | Cogeneration heat needed for DAC     | kW                                     | 0        | 0              | 0             | 42473         | 42473        | 0                |
| R24 | R18*(R9+R12)                                | HP Waste heat                        | kW                                     | -79845   | -78421         | -81666        | -79845        | -79845       | -5.63            |
| R25 | R24+R21+R22                                 | Total heat available (250-175 °C)    | kW                                     | -79095   | -77699         | -80915        | -79845        | -79722       | -2.64            |
| R26 | R25*R17                                     | Electricity produced from waste heat | kW                                     | 0        | -31079         | -32366        | -22357        | -22322       | -0.26            |
| R27 | R18*(R3+R13)+R20+R26                        | Total electricity demand/production  | kW                                     | 27238    | -9870          | -10280        | -1085         | -1254        | 1.22             |
| R28 | R7*R18                                      | Gross energy input through methane   | kW                                     | 35386    | 0              | 35386         | 0             | 0            | 0                |
| R29 | R27/ $\eta_{RE}$ (if R27 < 0, then R29 = 0) | Gross energy input through other RE  | kW                                     | 136190   | 0              | 0             | 0             | 0            | 6.10             |
| R30 | R1/ $\eta_{opt}$ +R28+R29                   | Total gross energy input             | kW                                     | 1271576  | 1100000        | 1135386       | 1100000       | 1100000      | 83.7             |
| R31 | R16*R18                                     | Methanol production                  | kg MeOH/h                              | 17670    | 16968          | 17670         | 17670         | 17670        | 1.25             |
| R32 | R31*HHV <sub>MeOH</sub>                     | Total energy output through fuel     | kW                                     | 112402   | 107937         | 112402        | 112402        | 112402       | 7.93             |
| R33 | R32/R30                                     | Solar-to-fuel efficiency             | %                                      | 8.84%    | 9.81%          | 9.90%         | 10.22%        | 10.22%       | 9.47%            |
